# Supplementary material for: Thrombomodulin is associated with increased mortality and organ failure in mechanically ventilated children with acute respiratory failure: biomarker analysis from a multicenter randomized controlled trial
Source: Springer Nature journal article supplement (doi:10.1186/s13054-021-03626-1), 2021-08-03

**Total Enrolled = 549**

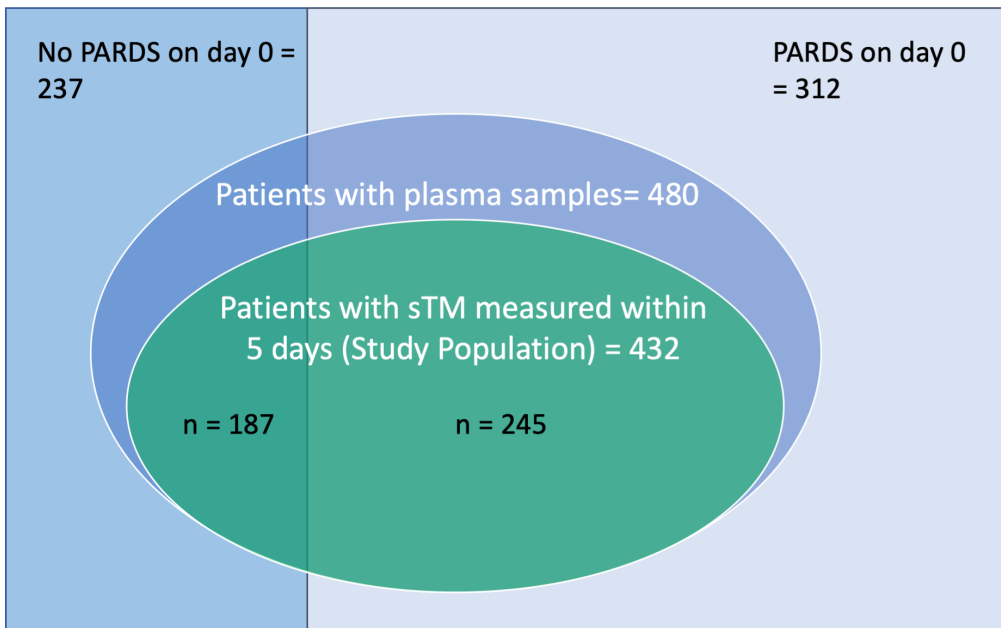

sTM in Patients With and Without ARDS

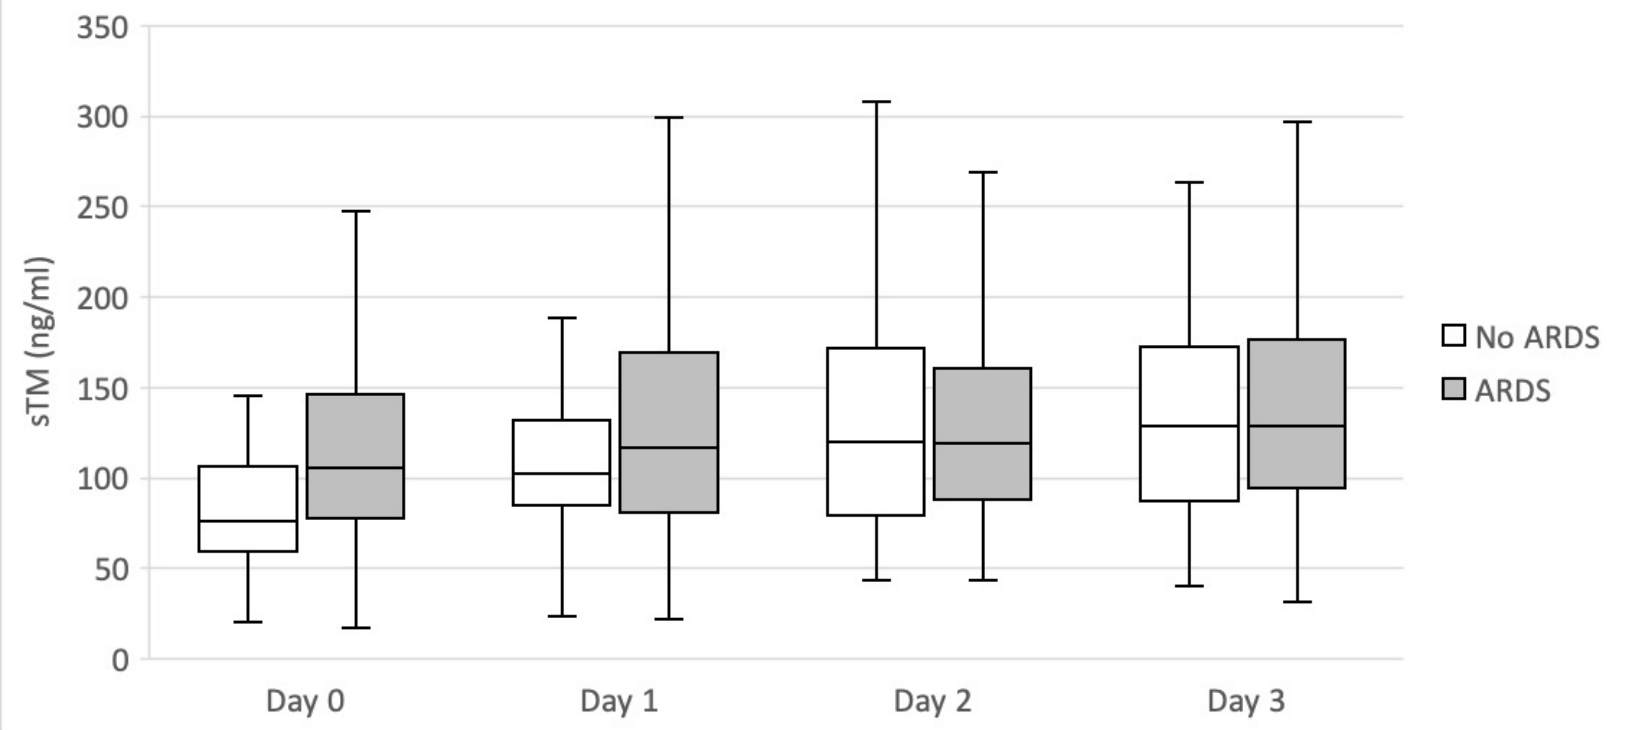

Supplement: MOESM2 [file 19538154]
